# Supplementary material for: Nonvolatile metabolite alterations during Zijuan black tea processing affect the protective potential on HOECs exposed to nicotine
Source: Royal Society of Chemistry journal article supplement (doi:10.1039/d1fo02852a), 2021-01-01
Supplement: d1fo02852a1.pdf [file d1fo02852a1.pdf]

1

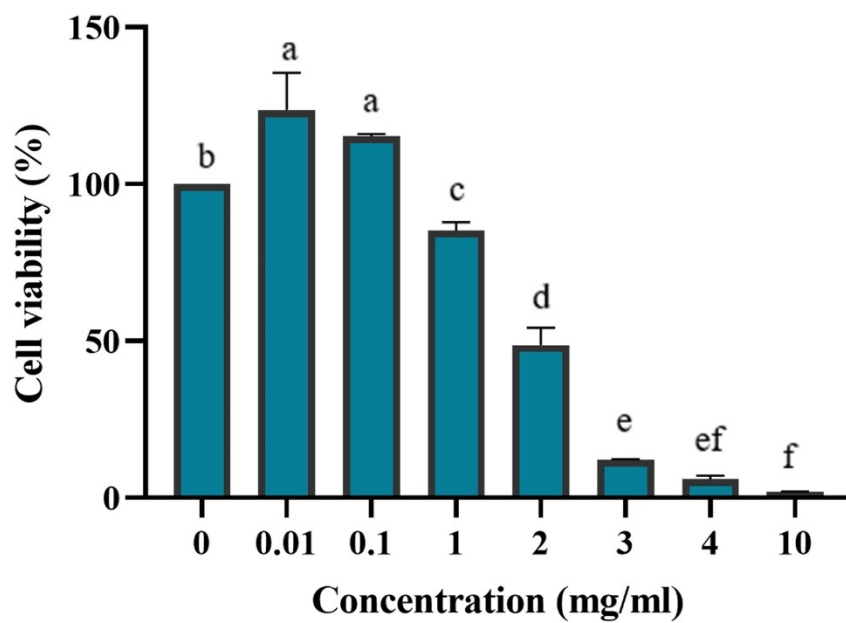

2

3 **Figure S1.** Cell viabilities under the treatment of different nicotine-concentrations

4

5

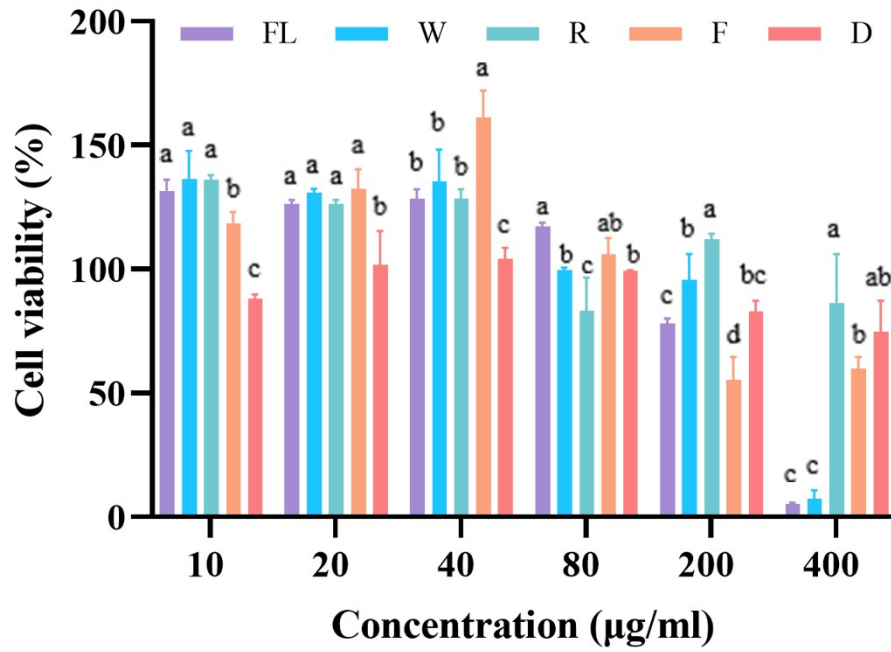

6

7 **Figure S2.** The viability of HOEC under different tea extracts concentration.

8

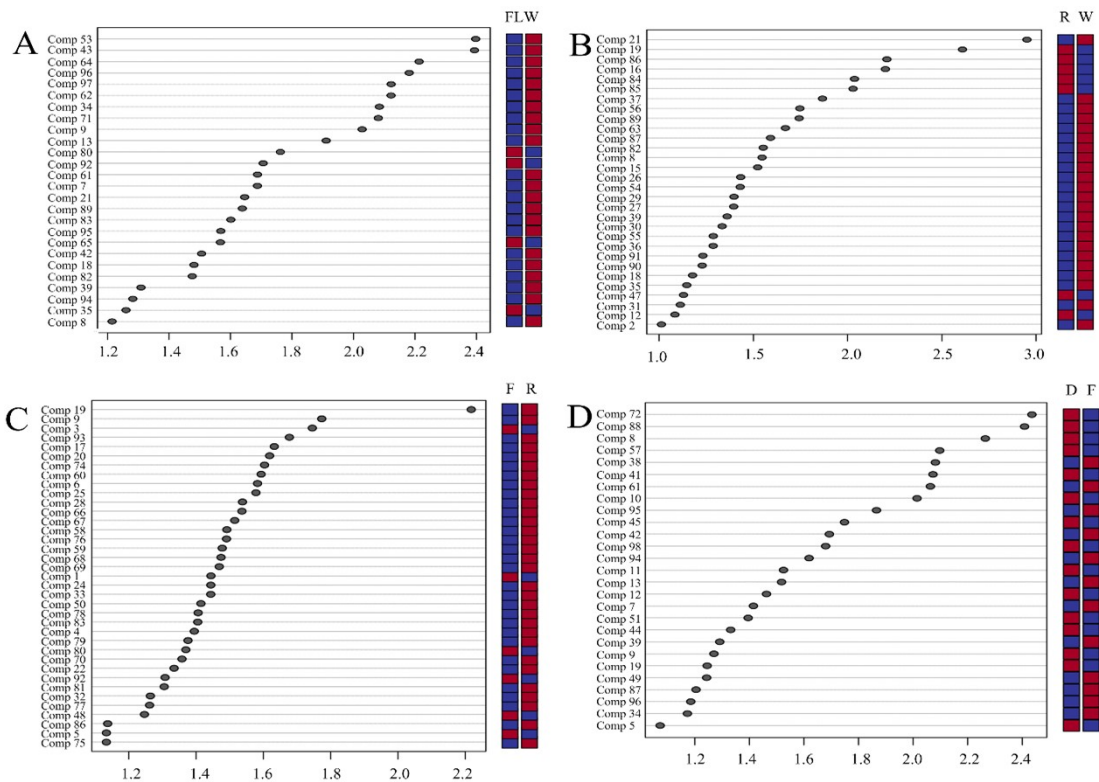

9

10 **Figure S3.** VIP score analysis of metabolites during manufacturing process of black tea. (A)

11 Withering process, (B) Rolling process, (C) Fermentation process, and (D) Drying process.

12

13

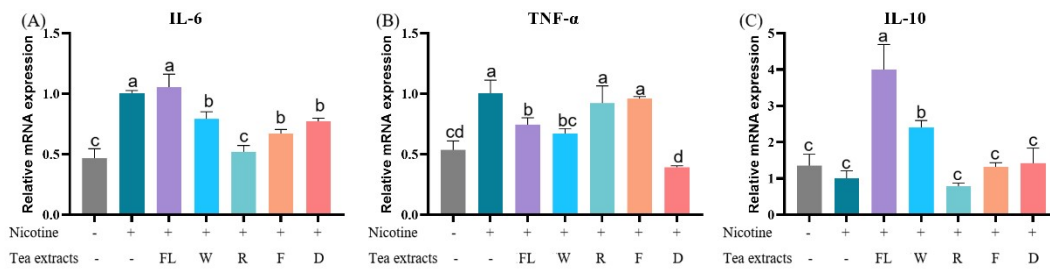

14

15 **Figure S4.** Relative mRNA expression of inflammatory factors after the treatment of nicotine

16 and tea extracts

17

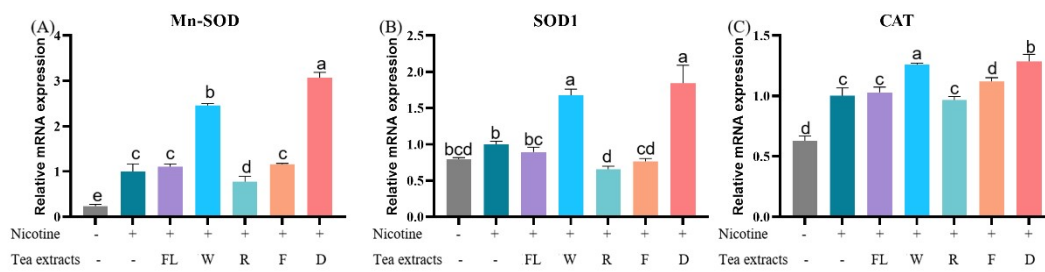

19

20 **Figure S5.** Relative mRNA expression of antioxidant enzymes after the treatment of nicotine  
21 and tea extracts

22
